# Supplementary material for: Gas phase synthesis and reactivity of Agn+ and Agn–1H+ cluster cations
Source: Royal Society of Chemistry journal article supplement (doi:10.1039/b505645b), 2005-01-01
Supplement: b505645b-esi.pdf [file b505645b-esi.pdf]

**Supplementary Material For Dalton Trans. Manuscript (Version: 21 April 2005) “Gas Phase Synthesis and Reactivity of  $\text{Ag}_n^+$  and  $\text{Ag}_{(n-1)}\text{H}^+$  Cluster Cations.” by George N. Khairallah and Richard A. J. O’Hair\*, School of Chemistry and Bio21 Institute of Molecular Science and Biotechnology, The University of Melbourne, Victoria 3010, AUSTRALIA**

\* Corresponding Author: Phone +61 3 8344-2452; FAX: +613 9347-5180, EMAIL:

rohair@unimelb.edu.au

**List of Supplementary Material:**

**(A) Cartesian Coordinates for structures shown in Figures 2, 3 and 4;**

**(B) Supplementary Figures S1 and S2;**

**(C) Supplementary Tables S1 and S2.**

**(A) Cartesian Coordinates for structures shown in Figures 2, 3 and 4****structure 1**

|    |           |           |          |
|----|-----------|-----------|----------|
| Ag | 1.376951  | -0.795392 | 0.000000 |
| Ag | 0.000000  | 1.589337  | 0.000000 |
| Ag | -1.376951 | -0.793946 | 0.000000 |

**structure 2a**

|    |           |           |           |
|----|-----------|-----------|-----------|
| Ag | 2.488199  | -0.958795 | -0.937246 |
| Ag | 2.486446  | 0.959373  | 0.937885  |
| Ag | 0.000134  | -0.000758 | -0.000338 |
| Ag | -2.487023 | 0.944290  | -0.952496 |
| Ag | -2.487756 | -0.944110 | 0.952194  |

**structure 2b**

|    |           |           |          |
|----|-----------|-----------|----------|
| Ag | 2.538377  | -1.247550 | 0.000000 |
| Ag | 0.360393  | -2.805131 | 0.000000 |
| Ag | 0.000000  | 0.000048  | 0.000000 |
| Ag | -0.360481 | 2.805210  | 0.000000 |
| Ag | -2.538288 | 1.247424  | 0.000000 |

**structure 3**

|    |           |           |           |
|----|-----------|-----------|-----------|
| Ag | 0.824089  | 2.371297  | 0.496369  |
| Ag | -1.051143 | 0.430301  | 0.012889  |
| Ag | -3.043767 | -0.788810 | -1.603134 |
| Ag | -3.617491 | -0.329553 | 0.961250  |
| Ag | 1.754285  | -0.195307 | 0.237686  |
| Ag | 3.864922  | -1.592151 | -1.053912 |
| Ag | 3.003804  | -2.515888 | 1.295084  |

**structure 4**

|    |          |          |          |
|----|----------|----------|----------|
| Ag | 0.000000 | 0.000000 | 2.519069 |
|----|----------|----------|----------|

|    |           |           |           |
|----|-----------|-----------|-----------|
| Ag | 0.000000  | 2.395796  | 0.779047  |
| Ag | 0.000000  | 1.481190  | -2.038235 |
| Ag | 0.000000  | -1.481190 | -2.038235 |
| Ag | 0.000000  | -2.395796 | 0.779047  |
| Ag | 1.380987  | 0.000000  | -0.000346 |
| Ag | -1.380987 | 0.000000  | -0.000346 |

**structure 5**

|    |           |           |           |
|----|-----------|-----------|-----------|
| Ag | 0.000000  | -0.202575 | 2.803631  |
| Ag | -2.427355 | 0.202790  | 1.402279  |
| Ag | -2.427355 | -0.202790 | -1.402279 |
| Ag | 0.000000  | 0.202575  | -2.803631 |
| Ag | 2.427355  | -0.202790 | -1.402279 |
| Ag | 2.427355  | 0.202790  | 1.402279  |
| Ag | 0.000000  | 0.000000  | 0.000000  |

**structure 6**

|    |           |           |           |
|----|-----------|-----------|-----------|
| Ag | 0.824089  | 2.371297  | 0.496369  |
| Ag | -1.051143 | 0.430301  | 0.012889  |
| Ag | -3.043767 | -0.788810 | -1.603134 |
| Ag | -3.617491 | -0.329553 | 0.961250  |
| Ag | 1.754285  | -0.195307 | 0.237686  |
| Ag | 3.864922  | -1.592151 | -1.053912 |
| Ag | 3.003804  | -2.515888 | 1.295084  |

**structure 7**

|    |           |           |          |
|----|-----------|-----------|----------|
| Ag | 0.009807  | 1.503374  | 0.000000 |
| Ag | 0.009807  | -1.503372 | 0.000000 |
| H  | -0.921879 | -0.000090 | 0.000000 |

**structure 8**

|    |           |           |           |
|----|-----------|-----------|-----------|
| Ag | -0.445931 | -0.000688 | 0.354415  |
| Ag | -3.442631 | 0.000109  | -0.174330 |

|    |           |           |           |
|----|-----------|-----------|-----------|
| Ag | 1.966926  | 1.344088  | -0.100538 |
| Ag | 1.967754  | -1.343499 | -0.100786 |
| H  | -2.167547 | -0.000493 | 0.998236  |

**structure 9**

|    |           |           |           |
|----|-----------|-----------|-----------|
| Ag | 1.434346  | 1.612044  | -0.002560 |
| Ag | 2.550824  | -0.948088 | 0.001999  |
| Ag | -2.551064 | -0.947875 | 0.001580  |
| Ag | -1.434318 | 1.611747  | -0.002932 |
| Ag | 0.000698  | -0.698599 | -1.352700 |
| Ag | -0.000485 | -0.688458 | 1.354658  |
| H  | -0.000018 | 2.783740  | -0.002097 |

**structure 10**

|    |           |           |           |
|----|-----------|-----------|-----------|
| Ag | 0.407899  | -1.007382 | 0.000415  |
| Ag | 1.854267  | 1.444683  | 0.000382  |
| Ag | -0.978747 | 1.668415  | -0.000618 |
| Ag | -2.216066 | -0.573668 | -1.349263 |
| Ag | -2.216646 | -0.572407 | 1.349412  |
| Ag | 3.138938  | -1.020972 | 0.000112  |
| H  | 0.485550  | 2.748577  | 0.000174  |

**structure 11**

|    |           |           |           |
|----|-----------|-----------|-----------|
| Ag | 0.476610  | -0.000003 | 2.706190  |
| Ag | 0.207071  | 2.503227  | 1.195377  |
| Ag | -0.294298 | 2.089080  | -1.674625 |
| Ag | -0.292945 | -2.089079 | -1.674863 |
| Ag | 0.205946  | -2.503225 | 1.195578  |
| Ag | 0.011517  | -0.000001 | 0.046555  |
| H  | -0.313902 | 0.000000  | -1.794212 |

**structure 12**

|    |           |           |           |
|----|-----------|-----------|-----------|
| Ag | 0.822985  | 2.526358  | -0.046732 |
| Ag | -0.966440 | 0.441113  | -0.010529 |
| Ag | -3.138892 | -0.815149 | -1.331407 |
| Ag | -3.175224 | -0.718010 | 1.337402  |
| Ag | 1.869731  | 0.020379  | 0.049266  |
| Ag | 4.527950  | -1.421234 | -0.001196 |
| H  | 2.814789  | -1.572555 | 0.150214  |

**structure 13a**

|    |           |           |           |
|----|-----------|-----------|-----------|
| C  | 4.552578  | 3.406767  | 0.030227  |
| Ag | -0.246003 | -0.238982 | -0.003478 |
| N  | 3.822129  | 2.515161  | 0.022206  |
| Ag | -2.679142 | 0.355684  | -1.332560 |
| Ag | -2.683122 | 0.310738  | 1.337852  |
| Ag | 2.449508  | 0.654675  | 0.004950  |
| H  | 5.234239  | 4.237216  | 0.038579  |
| Ag | 1.896959  | -1.981773 | -0.014751 |

**structure 13b**

|    |           |           |           |
|----|-----------|-----------|-----------|
| N  | -4.340908 | 3.471563  | 0.072109  |
| Ag | 0.246545  | -0.298574 | -0.001942 |
| C  | -3.671371 | 2.522861  | 0.040318  |
| Ag | 2.679273  | 0.289337  | 1.336527  |
| Ag | 2.658838  | 0.383499  | -1.331556 |
| Ag | -2.442924 | 0.675350  | 0.008252  |
| H  | -4.926492 | 4.288136  | 0.102978  |
| Ag | -1.921709 | -1.979957 | -0.029358 |

**structure 14a**

|    |           |           |           |
|----|-----------|-----------|-----------|
| N  | 0.359994  | -0.211343 | 0.042169  |
| Ag | -4.298137 | -1.231387 | -0.058857 |
| C  | 1.518483  | -0.337999 | 0.062430  |
| Ag | -1.803734 | -0.012361 | 0.007732  |
| Ag | -4.161076 | 1.450176  | 0.022016  |

|    |          |           |           |
|----|----------|-----------|-----------|
| Ag | 3.614782 | -0.600796 | 0.094414  |
| H  | 5.352162 | -0.978056 | 0.147213  |
| Ag | 6.286824 | 0.489803  | -0.082686 |

**structure 14b**

|    |           |           |           |
|----|-----------|-----------|-----------|
| C  | -0.354718 | -0.132730 | 0.120373  |
| Ag | 4.290684  | -1.246582 | -0.183562 |
| N  | -1.516393 | -0.211046 | 0.188915  |
| Ag | 1.786131  | -0.016460 | 0.022800  |
| Ag | 4.188499  | 1.413636  | 0.052746  |
| Ag | -3.613594 | -0.460078 | 0.364049  |
| H  | -5.317418 | -0.804119 | 0.606991  |
| Ag | -6.267455 | 0.374970  | -0.312451 |

**structure 15a**

|    |           |           |           |
|----|-----------|-----------|-----------|
| H  | 0.157446  | -0.762691 | 1.697064  |
| Ag | 1.550121  | -0.259077 | 0.633832  |
| Ag | -1.375246 | -0.446972 | 0.972186  |
| Ag | 3.757609  | -1.038050 | -0.919567 |
| Ag | 3.614585  | 1.500735  | -0.095699 |
| N  | -3.372895 | -0.128073 | 0.243677  |
| Ag | -6.476464 | 0.275693  | -0.651951 |
| C  | -4.477601 | 0.023286  | -0.087738 |

**structure 15b**

|    |           |           |           |
|----|-----------|-----------|-----------|
| H  | 0.169491  | -0.506988 | 1.751263  |
| Ag | 1.571071  | -0.184250 | 0.660640  |
| Ag | -1.393454 | -0.325408 | 1.000424  |
| Ag | 3.757154  | -1.134078 | -0.826799 |
| Ag | 3.665848  | 1.467023  | -0.224679 |
| C  | -3.378724 | -0.130291 | 0.263698  |
| Ag | -6.505865 | 0.207715  | -0.663888 |
| N  | -4.478664 | -0.024054 | -0.111603 |

**structure 15c**

|    |           |           |           |
|----|-----------|-----------|-----------|
| H  | 2.905008  | -1.591851 | 0.893292  |
| Ag | 1.980868  | -0.079283 | 0.332813  |
| Ag | 4.174915  | -2.065372 | -0.177155 |
| Ag | 1.303270  | 2.517790  | -0.133758 |
| Ag | -0.712085 | 0.719381  | -0.004799 |
| C  | -3.893826 | -0.407090 | -0.027137 |
| Ag | -5.897419 | -0.997029 | -0.029448 |
| N  | -2.781552 | -0.064784 | -0.021448 |

**structure 15d**

|    |           |           |           |
|----|-----------|-----------|-----------|
| H  | 2.871315  | -1.675581 | 0.734116  |
| Ag | 1.993492  | -0.098517 | 0.277468  |
| Ag | 4.334279  | -1.924387 | -0.148791 |
| Ag | 1.247148  | 2.475531  | -0.100767 |
| Ag | -0.750372 | 0.627333  | -0.012048 |
| N  | -3.896618 | -0.471506 | -0.035960 |
| Ag | -5.949850 | -0.959451 | -0.022093 |
| C  | -2.784302 | -0.114627 | -0.031597 |

**structure 15e**

|    |           |           |           |
|----|-----------|-----------|-----------|
| H  | 0.581404  | -2.321997 | -0.001076 |
| Ag | 0.246427  | -0.442822 | -0.001957 |
| Ag | 2.349194  | -2.303973 | -0.001016 |
| Ag | 2.764874  | 0.828236  | 0.004852  |
| Ag | 0.557470  | 2.369264  | -0.002860 |
| C  | -3.146110 | -0.232536 | -0.002305 |
| Ag | -5.233443 | -0.341268 | 0.002242  |
| N  | -1.982468 | -0.203760 | -0.006330 |

**structure 15f**

|    |         |          |          |
|----|---------|----------|----------|
| H  | 0.59943 | -2.31940 | 0.00371  |
| Ag | 0.20790 | -0.45623 | 0.00402  |
| Ag | 2.37835 | -2.22562 | -0.00022 |
| Ag | 2.77091 | 0.78669  | -0.00415 |

|    |          |          |          |
|----|----------|----------|----------|
| Ag | 0.55917  | 2.33784  | 0.00180  |
| N  | -3.11396 | -0.12813 | -0.00259 |
| Ag | -5.21668 | -0.34944 | -0.00204 |
| C  | -1.94754 | -0.19437 | 0.00700  |

**structure 16a**

|    |           |           |           |
|----|-----------|-----------|-----------|
| C  | -3.042204 | 0.000694  | 0.000386  |
| Ag | 0.317497  | -0.000134 | 0.000491  |
| Ag | -5.136754 | -0.000086 | -0.000221 |
| Ag | 2.743763  | -1.344894 | -0.000188 |
| Ag | 2.743609  | 1.344964  | -0.000188 |
| N  | -1.878311 | 0.000415  | 0.000380  |

**structure 16b**

|    |           |           |           |
|----|-----------|-----------|-----------|
| C  | -1.851839 | -0.001640 | 0.063603  |
| Ag | 0.305157  | -0.001011 | 0.041042  |
| Ag | 2.756110  | 1.338915  | -0.017019 |
| Ag | -5.133097 | 0.000710  | -0.024269 |
| Ag | 2.757875  | -1.337622 | -0.017125 |
| N  | -3.019012 | -0.005250 | 0.062116  |

**structure 16c**

|    |           |           |           |
|----|-----------|-----------|-----------|
| C  | -2.751526 | 0.377023  | -0.003167 |
| Ag | -0.911792 | 1.530196  | -0.007584 |
| Ag | 1.301865  | -0.017651 | 1.353604  |
| Ag | -0.878709 | -1.419160 | 0.004735  |
| Ag | 1.306854  | -0.031537 | -1.350658 |
| Ag | -3.135292 | -0.738431 | 0.002063  |



Figure S1: LCQ CID MS<sup>n</sup> spectra of various silver cluster ions: (a) Ag<sub>3</sub><sup>+</sup>; (b) Ag<sub>2</sub>H<sup>+</sup>; (c) Ag<sub>5</sub><sup>+</sup>; (d) Ag<sub>4</sub>H<sup>+</sup>. A \* designated the mass selected precursor cluster.

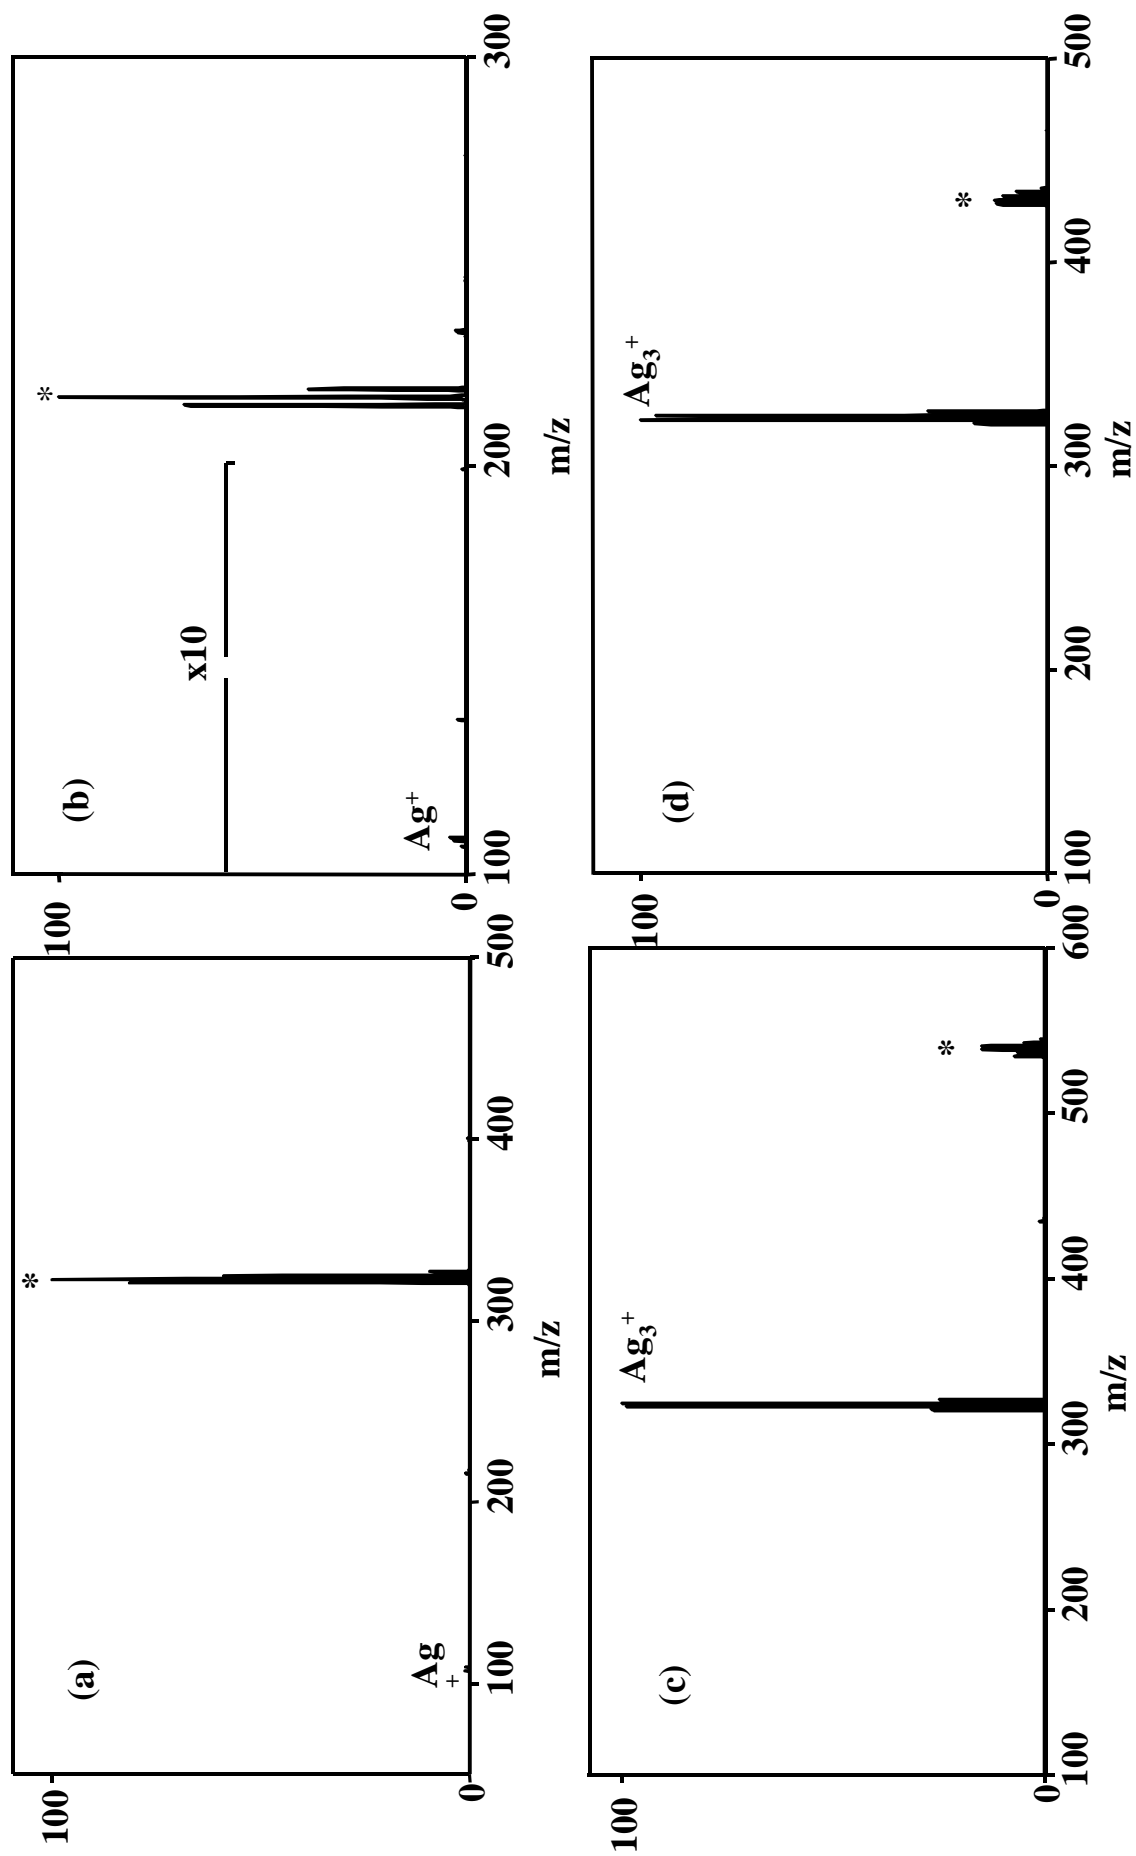

Figure S1: LCQ CID MS<sup>n</sup> spectra of various silver cluster ions: (e) Ag<sub>7</sub><sup>+</sup>; (f) Ag<sub>6</sub>H<sup>+</sup>; (g) Ag<sub>5</sub>(H,C,N)<sup>+</sup>; (h) Ag<sub>4</sub>CN<sup>+</sup>. A \* designated the mass selected precursor cluster.

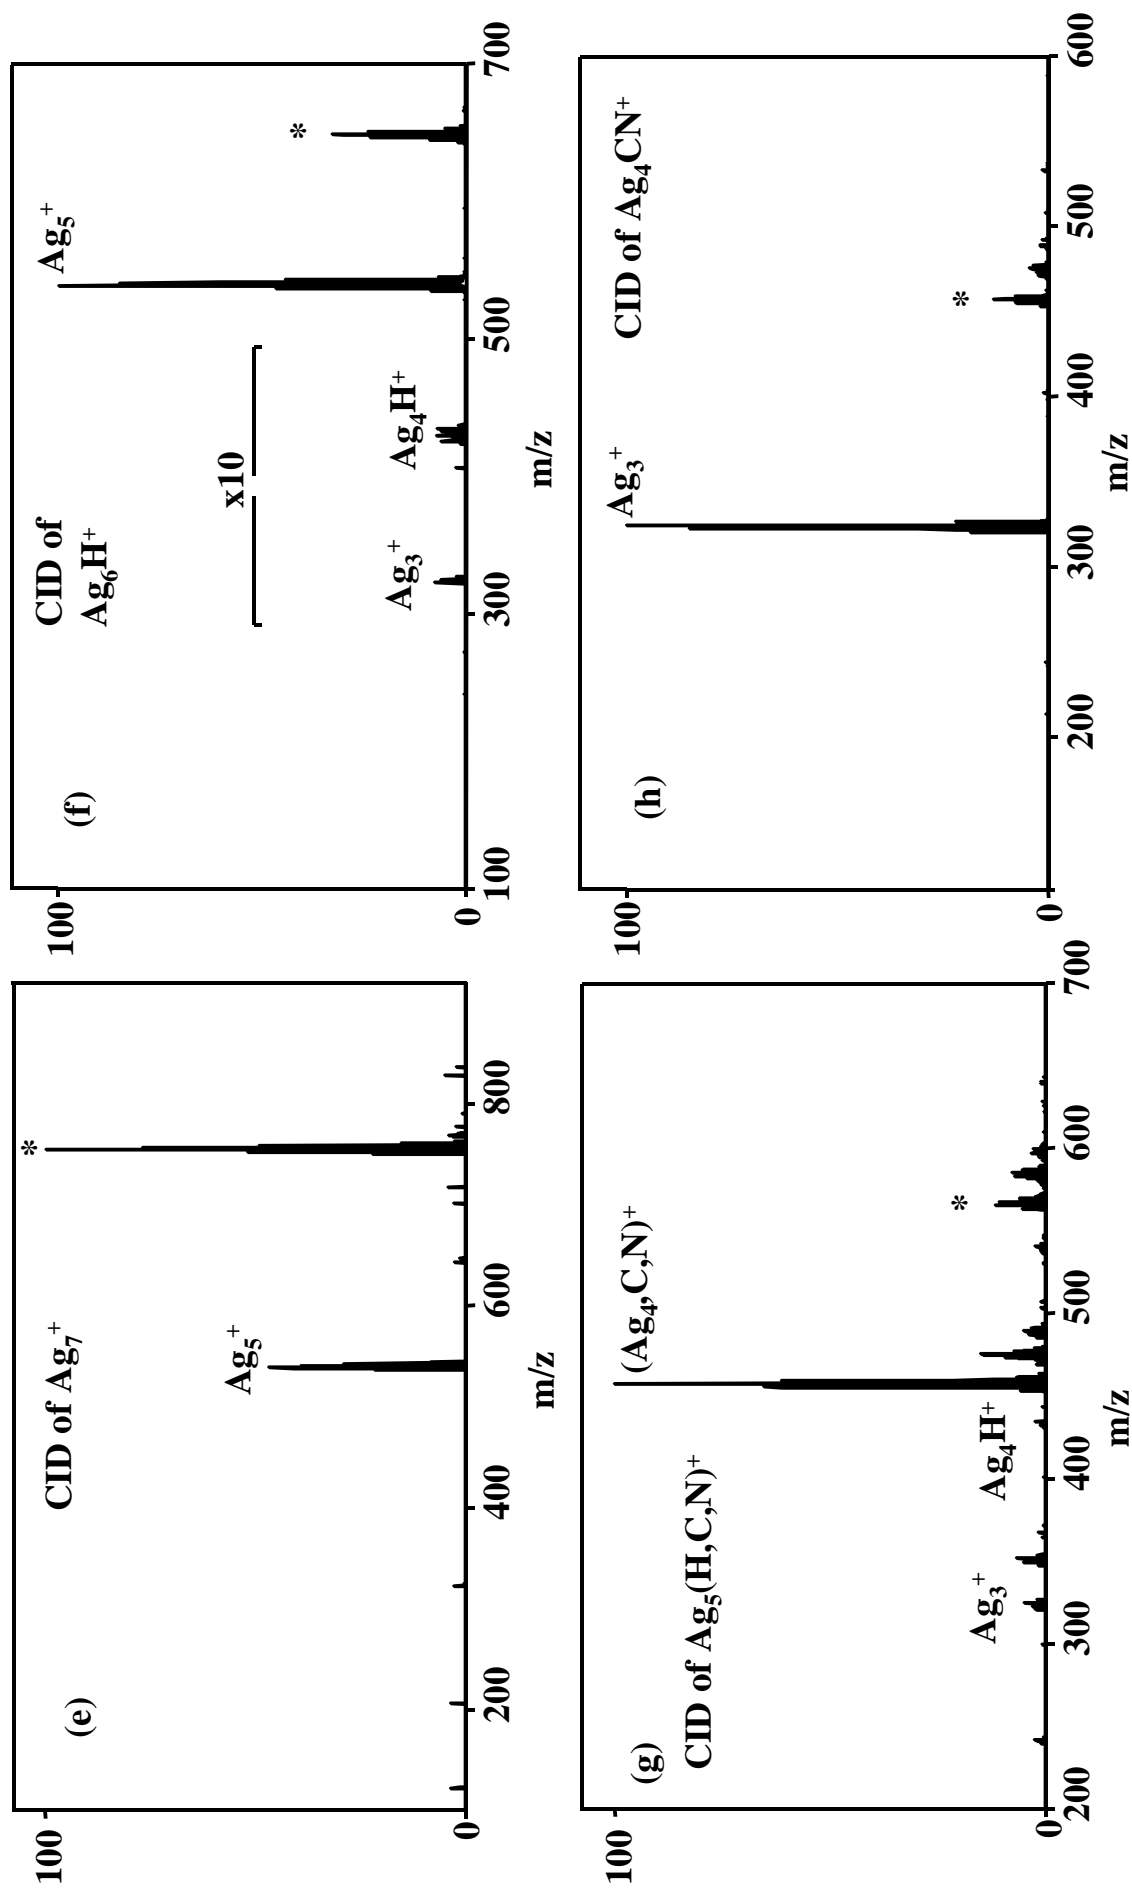

**Figure S2: Ion-molecule reactions of silver cluster ions reacting with 2-propanol (L) under similar reaction conditions (pressure of 2-propanol  $\approx 10^{-7}$  torr; reaction time = 0.3 s): (a)  $\text{Ag}_2\text{H}^+$ ; (b)  $\text{Ag}_3^+$ ; (c)  $\text{Ag}_4\text{H}^+$ ; (d)  $\text{Ag}_5^+$ .**

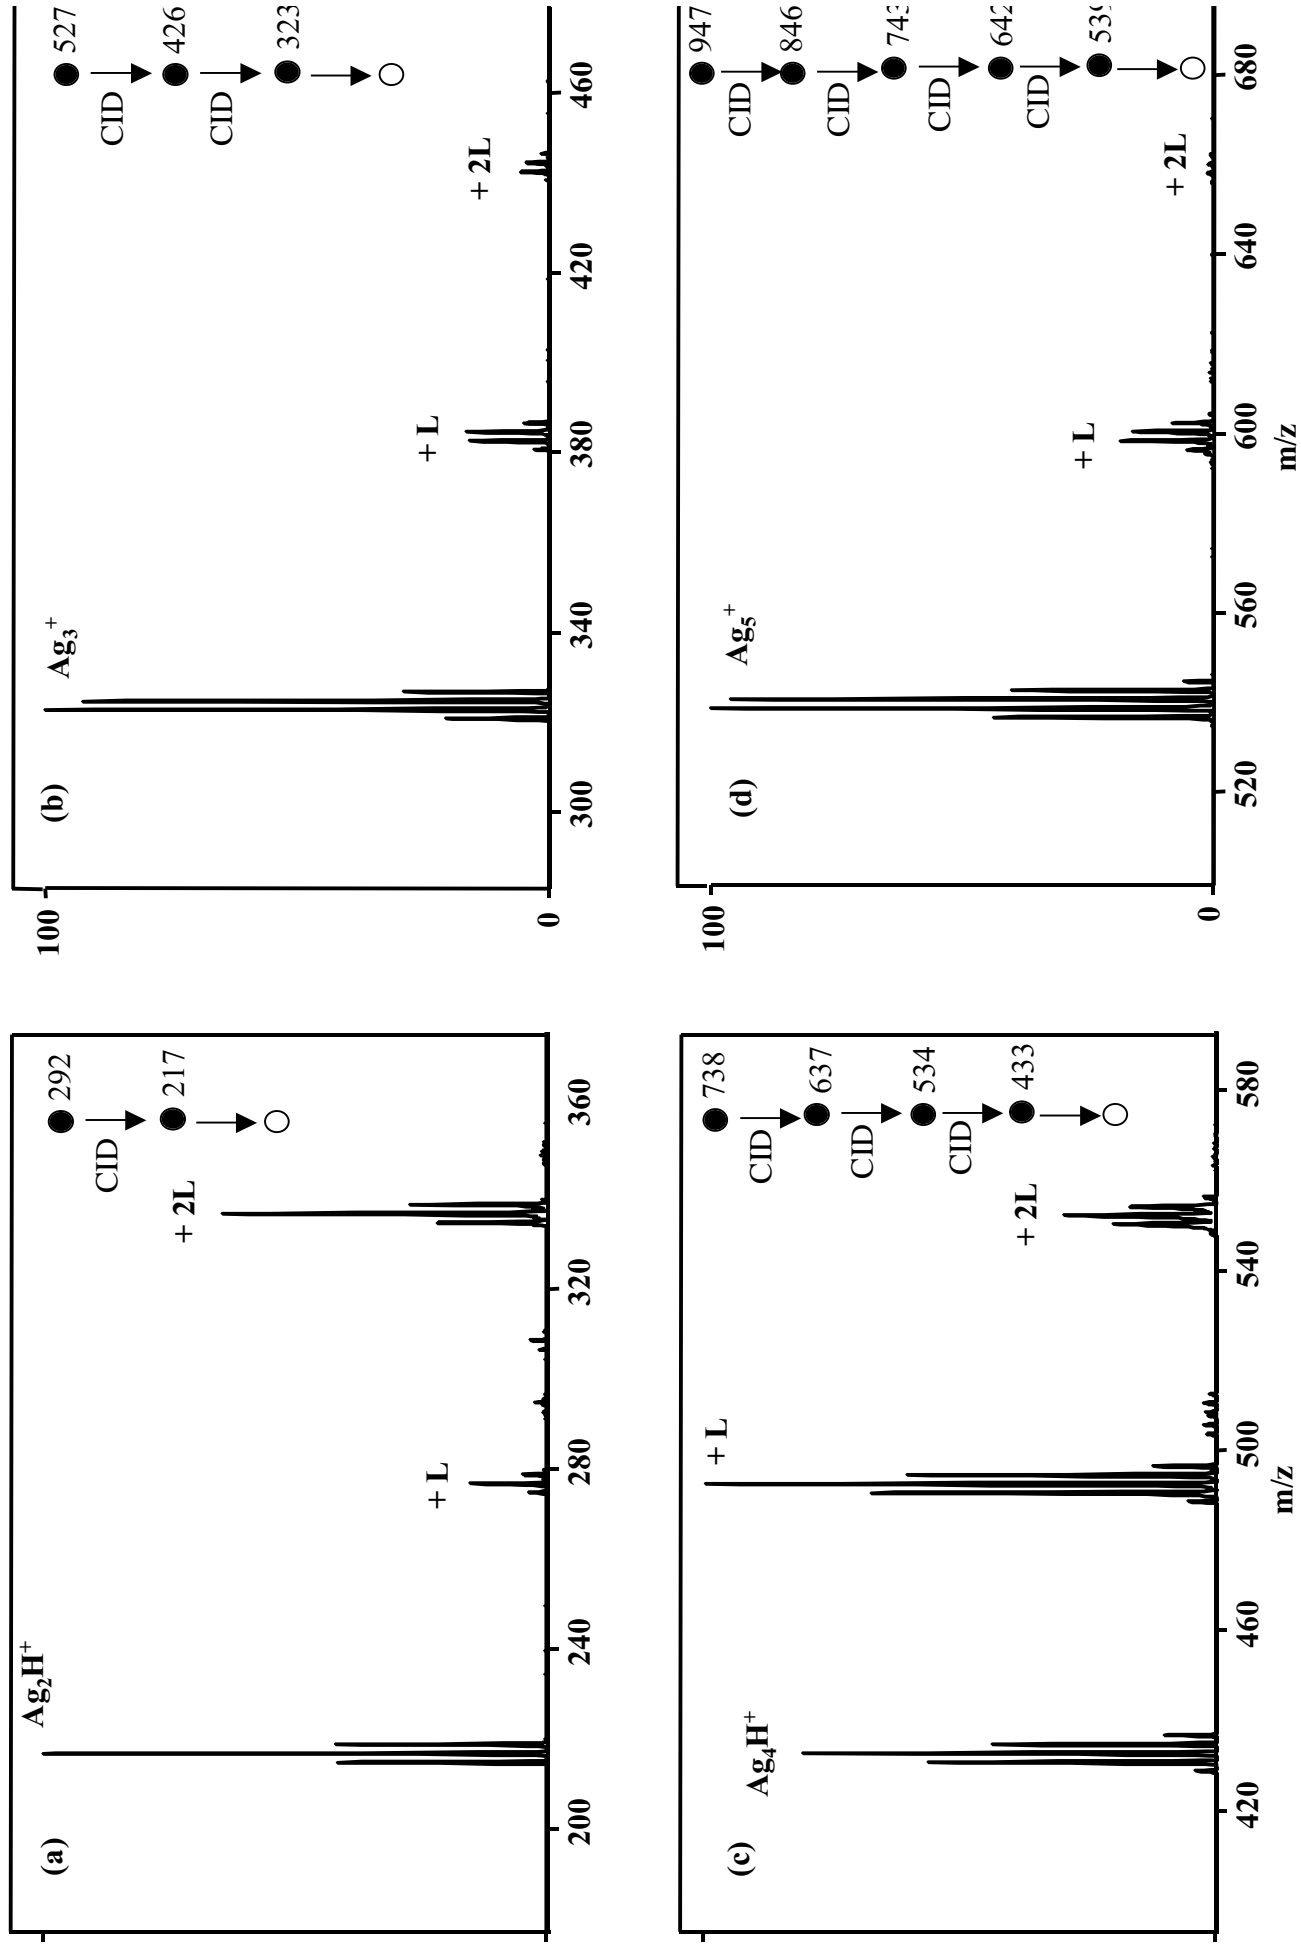

**Table S1:** DFT calculated energies for various structures relevant to the silver clusters used in the thermochemistry calculations. The scaling factor used is 0.9806 and the basis sets were LanL2DZ for Ag and 6-31G\* for C, N and H.

| Structure number in Figs. <sup>a</sup> | Structure shown in <sup>b</sup> | E(B3LYP) <sup>c</sup> | E (MP2) (SPE) <sup>d</sup> | ZPE <sup>e</sup> | ZPE Scaled <sup>f</sup> | E(B3LYP) Scaled <sup>g</sup> | E (MP2) Scaled <sup>h</sup> | Relative Energy at B3LYP <sup>i</sup> | Relative Energy at MP2 <sup>j</sup> |
|----------------------------------------|---------------------------------|-----------------------|----------------------------|------------------|-------------------------|------------------------------|-----------------------------|---------------------------------------|-------------------------------------|
| Ag <sup>+</sup>                        |                                 | -145.47379            | -144.71911                 |                  |                         |                              | -144.71911                  |                                       |                                     |
| Ag <sub>2</sub>                        |                                 | -291.57443            | -289.96641                 | 0.000403         | 0.000395182             | -291.57403                   | -289.9660148                |                                       |                                     |
| AgH                                    |                                 | -146.34211            | -145.516457                | 0.003867         | 0.00379198              | -146.33832                   | -145.512665                 |                                       |                                     |
| Ag <sub>3</sub> H                      |                                 | -437.94415            | -435.51844                 | 0.005126         | 0.005026556             | -437.93912                   | -435.5134134                |                                       |                                     |
| Ag <sub>3</sub> <sup>+</sup> , 1       | Fig.2                           | -437.14447            | -434.77584                 | 0.000887         | 0.000869792             | -437.1436                    | -434.7749702                |                                       |                                     |
| Ag <sub>2</sub> H <sup>+</sup> , 7     | Fig.2                           | -291.89609            | -290.3135                  | 0.005414         | 0.005308968             | -291.89078                   | -290.308191                 |                                       |                                     |
| Ag <sub>5</sub> <sup>+</sup> , 2a      | Fig.2                           | -728.77211            | -724.80309                 | 0.001796         | 0.001761158             | -728.77035                   | -724.8013288                | 0                                     | 0                                   |
| , 2b                                   | Fig.2                           | -728.77094            | -724.80295                 | 0.001782         | 0.001747429             | -728.76919                   | -724.8012026                | 0.7                                   | 0.1                                 |
| Ag <sub>4</sub> H <sup>+</sup> , 8     | Fig.2                           | -583.53561            | -580.33745                 | 0.006832         | 0.006699459             | -583.52891                   | -580.3307505                |                                       |                                     |
| Ag <sub>7</sub> <sup>+</sup> , 5       | Fig.2                           | -1020.40999           | -1014.85657                | 0.002981         | 0.002923169             | -1020.4071                   | -1014.853647                | 0                                     | 9.0                                 |
| , 4                                    | Fig.2                           | -1020.399             | -1014.87094                | 0.00307          | 0.003010442             | -1020.396                    | -1014.86793                 | 6.9                                   | 0                                   |

| Structure number in Figs. <sup>a</sup>   | Structure shown in <sup>b</sup> | E(B3LYP) <sup>c</sup> | E (MP2) (SPE) <sup>d</sup> | ZPE <sup>e</sup> | ZPE Scaled <sup>f</sup> | E(B3LYP) Scaled <sup>g</sup> | E (MP2) Scaled <sup>h</sup> | Relative Energy at B3LYP <sup>i</sup> | Relative Energy at MP2 <sup>j</sup> |
|------------------------------------------|---------------------------------|-----------------------|----------------------------|------------------|-------------------------|------------------------------|-----------------------------|---------------------------------------|-------------------------------------|
| <b>, 3</b>                               | Fig.2                           | -1020.39975           | -1014.85741                | 0.002962         | 0.002904537             | -1020.3968                   | -1014.854505                | 6.4                                   | 8.4                                 |
| <b>, 6</b>                               | Fig.2                           | -1020.38894           | -1014.82227                | 0.002681         | 0.002628989             | -1020.3863                   | -1014.819641                | 13.0                                  | 30.3                                |
| <b>Ag<sub>6</sub>H<sup>+</sup>, 9</b>    | Fig.2                           | -875.161074           | -870.395586                | 0.007906         | 0.007752624             | -875.15332                   | -870.3878334                | 1.0                                   | 0                                   |
| <b>, 12</b>                              | Fig.2                           | -875.15476            | -870.36993                 | 0.007593         | 0.007445696             | -875.14731                   | -870.3624843                | 4.8                                   | 15.9                                |
| <b>, 11</b>                              | Fig.2                           | -875.16071            | -870.38525                 | 0.006867         | 0.00673378              | -875.15398                   | -870.3785162                | 0.6                                   | 5.8                                 |
| <b>, 10</b>                              | Fig.2                           | -875.16257            | -870.38835                 | 0.007767         | 0.00761632              | -875.15495                   | -870.3807337                | 0                                     | 4.5                                 |
| <b>Ag<sub>4</sub>CN<sup>+</sup>, 16a</b> | Fig.4                           | -675.80619            | -672.39938                 | 0.008821         | 0.008649873             | -675.79754                   | -672.3907301                | 0                                     | 0                                   |
| <b>, 16c</b>                             | Fig.4                           | -675.77056            | -672.37414                 | 0.00835          | 0.00818801              | -675.76237                   | -672.365952                 | 22.1                                  | 15.5                                |
| <b>Ag<sub>4</sub>NC<sup>+</sup>, 16b</b> | Fig.4                           | -675.79987            | -672.39548                 | 0.008757         | 0.008587114             | -675.79128                   | -672.3868929                | 3.9                                   | 2.4                                 |
| <b>AgH</b>                               |                                 | -146.34211            | -145.516457                | 0.003867         | 0.00379198              |                              | -145.512665                 |                                       |                                     |

| Structure number in Figs. <sup>a</sup>                       | Structure shown in <sup>b</sup> | E(B3LYP) <sup>c</sup> | E (MP2) (SPE) <sup>d</sup> | ZPE <sup>e</sup> | ZPE Scaled <sup>f</sup> | E(B3LYP) Scaled <sup>g</sup> | E (MP2) Scaled <sup>h</sup> | Relative Energy at B3LYP <sup>i</sup> | Relative Energy at MP2 <sup>j</sup> |
|--------------------------------------------------------------|---------------------------------|-----------------------|----------------------------|------------------|-------------------------|------------------------------|-----------------------------|---------------------------------------|-------------------------------------|
| HCN                                                          |                                 | -93.41988             | -93.15355                  | 0.016481         | 0.016161269             |                              | -93.1373887                 |                                       |                                     |
| HNC                                                          |                                 | -93.39345             | -93.12089                  | 0.015643         | 0.015339526             |                              | -93.1055505                 |                                       |                                     |
| AgCN                                                         |                                 | -238.59418            | -237.55144                 | 0.006981         | 0.006845569             | -238.58733                   | -237.5445944                |                                       |                                     |
| AgNC                                                         |                                 | -238.57108            | -237.52973                 | 0.006182         | 0.006062069             | -238.56502                   | -237.5236679                |                                       |                                     |
| Ag <sub>5</sub> (NCH) <sup>+</sup> , 13a                     | Fig. 3                          | -822.22499            | -817.99044                 | 0.019546         | 0.019166808             | -822.20582                   | -817.9712732                | 0                                     | 0                                   |
| HCN                                                          |                                 | -93.41988             | -93.15355                  | 0.016481         | 0.016161269             | -93.403719                   | -93.13738873                |                                       |                                     |
| Ag <sub>5</sub> (CNH) <sup>+</sup> , 13b                     | Fig. 3                          | -822.21073            | -817.96932                 | 0.019638         | 0.019257023             | -822.19147                   | -817.950063                 | 9.0                                   | 13.3                                |
| HNC                                                          |                                 | -93.39345             | -93.12089                  | 0.015643         | 0.015339526             | -93.37811                    | -93.10555047                |                                       |                                     |
| (Ag <sub>3</sub> )(NC)(Ag <sub>2</sub> H) <sup>+</sup> , 14a | Fig. 3                          | -822.20791            | -817.98299                 | 0.015674         | 0.015369924             | -822.19254                   | -817.9676201                | 8.3                                   | 2.3                                 |
| (Ag <sub>3</sub> )(NC)(Ag) <sup>+</sup> ,                    |                                 | -675.80619            | -672.399344                | 0.00882          | 0.008648892             | -675.79754                   | -672.3906951                |                                       |                                     |
| (Ag <sub>3</sub> )(CN)(Ag <sub>2</sub> H) <sup>+</sup> , 14b | Fig. 3                          | -822.20671            | -817.98145                 | 0.015771         | 0.015465043             | -822.19124                   | -817.965985                 | 9.1                                   | 3.3                                 |
| (Ag <sub>3</sub> )(NC)(Ag) <sup>+</sup> ,                    |                                 | -675.79987            | -672.39548                 | 0.008757         | 0.008587114             | -675.79128                   | -672.3868929                |                                       |                                     |
| (Ag <sub>4</sub> H)(NCAG) <sup>+</sup> , 15a                 | Fig. 3                          | -822.20292            | -817.97903                 | 0.01584          | 0.015532704             | -822.18739                   | -817.9634973                | 11.6                                  | 4.9                                 |

| Structure number in Figs. <sup>a</sup>          | Structure shown in <sup>b</sup> | E(B3LYP) <sup>c</sup> | E (MP2) (SPE) <sup>d</sup> | ZPE <sup>e</sup> | ZPE Scaled <sup>f</sup> | E(B3LYP) Scaled <sup>g</sup> | E (MP2) Scaled <sup>h</sup> | Relative Energy at B3LYP <sup>i</sup> | Relative Energy at MP2 <sup>j</sup> |
|-------------------------------------------------|---------------------------------|-----------------------|----------------------------|------------------|-------------------------|------------------------------|-----------------------------|---------------------------------------|-------------------------------------|
| (Ag <sub>4</sub> H)(CNAg) <sup>+</sup> ,<br>15b | Fig. 3                          | -822.19709            | -817.976115                | 0.015707         | 0.015402284             | -822.18169                   | -817.9607127                | 15.1                                  | 6.6                                 |
| (Ag <sub>4</sub> H)(NCAG) <sup>+</sup> ,<br>15c | Fig. 3                          | -822.18821            | -817.964597                | 0.014682         | 0.014397169             | -822.17381                   | -817.9501998                | 20.1                                  | 13.2                                |
| (Ag <sub>4</sub> H)(CNAG) <sup>+</sup> ,<br>15d | Fig. 3                          | -822.18084            | -817.959864                | 0.014647         | 0.014362848             | -822.16648                   | -817.9455012                | 24.7                                  | 16.2                                |
| (Ag <sub>4</sub> H)(NCAG) <sup>+</sup> ,<br>15e | Fig. 3                          | -822.1742             | -817.950649                | 0.014713         | 0.014427568             | -822.15977                   | -817.9362214                | 28.9                                  | 22.0                                |
| (Ag <sub>4</sub> H)(CNAG) <sup>+</sup> ,<br>15f | Fig. 3                          | -822.16827            | -817.947264                | 0.014718         | 0.014432471             | -822.15384                   | -817.9328315                | 32.6                                  | 24.1                                |

(a) The Structure name and number as it appears in the figures in the text.

(b) The figure where the relevant structure is shown.

(c) The converged geometries B3LYP energies.

(d) The single point energy at the MP2 level.

(e) Zero point energy.

(f) ZPE x 0.9806.

(g) The sum of the B3LYP energy and ZPE scaled.

(h) The sum of the MP2 energy and ZPE scaled.

(i) Energies (in kcal mol<sup>-1</sup>) of the various isotopomers relative to the most stable one at B3LYP.

(j) Energies (in kcal mol<sup>-1</sup>) of the various isotopomers relative to the most stable one at MP2.

Table S2: Calculated reaction energetics for various reactions discussed in text.

| CID reaction                                                                 | Relevant Structures in text<br>(reactants, products) <sup>a</sup> | B3LYP Reaction $\Delta H$<br>in kcal mol <sup>-1,b</sup> | MP2 Reaction $\Delta H$<br>in kcal.mol <sup>-1,c</sup> |
|------------------------------------------------------------------------------|-------------------------------------------------------------------|----------------------------------------------------------|--------------------------------------------------------|
| $\text{Ag}_3^+ \rightarrow \text{Ag}^+ + \text{Ag}_2$                        | (1)                                                               | 60.1                                                     | 56.4                                                   |
| $\text{Ag}_2\text{H}^+ \rightarrow \text{Ag}^+ + \text{AgH}$                 | (7)                                                               | 49.4                                                     | 48.0                                                   |
| $\text{Ag}_3^+ + \text{AgH} \rightarrow \text{Ag}_2\text{H}^+ + \text{Ag}_2$ | (1, 7)                                                            | 10.7                                                     | 8.4                                                    |
| $\text{Ag}_5^+ \rightarrow \text{Ag}_3^+ + \text{Ag}_2$                      | (2a, 1)                                                           | 33.1                                                     | 37.9                                                   |
| $\text{Ag}_4\text{H}^+ \rightarrow \text{Ag}_3^+ + \text{AgH}$               | (8, 1)                                                            | 29.5                                                     | 27.1                                                   |
| $\text{Ag}_5^+ + \text{AgH} \rightarrow \text{Ag}_4\text{H}^+ + \text{Ag}_2$ | (2a, 8)                                                           | 3.6                                                      | 10.8                                                   |
| $\text{Ag}_7^+ \rightarrow \text{Ag}_5^+ + \text{Ag}_2$                      | (5, 2a)                                                           | 39.3                                                     | 54.2                                                   |
|                                                                              | (4, 2a)                                                           | 32.4                                                     | 63.1                                                   |
|                                                                              | (3, 2a)                                                           | 32.9                                                     | 54.7                                                   |
|                                                                              | (6, 2a)                                                           | 26.3                                                     | 32.8                                                   |



| CID reaction                              | Relevant Structures in text<br>(reactants, products) <sup>a</sup> | B3LYP Reaction $\Delta H$<br>in kcal mol <sup>-1 b</sup> | MP2 Reaction $\Delta H$<br>in kcal mol <sup>-1 c</sup> |
|-------------------------------------------|-------------------------------------------------------------------|----------------------------------------------------------|--------------------------------------------------------|
| $Ag_6H^+ \rightarrow Ag_5^+ + AgH$        | (9, 2a)                                                           | 28.0                                                     | 46.3                                                   |
| $\rightarrow Ag_4H^+ + Ag_2$              | (9, 8)                                                            | 31.6                                                     | 57.1                                                   |
| $\rightarrow Ag_3^+ + Ag_3H$              | (9, 1)                                                            | 44.3                                                     | 62.4                                                   |
| $Ag_7^+ + AgH \rightarrow Ag_6H^+ + Ag_2$ | (4, 9)                                                            | 4.4                                                      | 16.8                                                   |
|                                           |                                                                   |                                                          |                                                        |
|                                           |                                                                   |                                                          |                                                        |
| $Ag_5HCN^+ \rightarrow Ag_5^+ + HCN$      | (13a, 2a)                                                         | 19.9                                                     | 20.4                                                   |
|                                           | (13b, 2a)                                                         | 27.0                                                     | 27.1                                                   |
|                                           |                                                                   |                                                          |                                                        |
| $Ag_5HCN \rightarrow Ag_4H^+ + AgCN$      | (15a, 8)                                                          | 44.6                                                     | 55.3                                                   |
|                                           | (15b, 8)                                                          | 55.1                                                     | 66.7                                                   |
|                                           | (15c, 8)                                                          | 36.1                                                     | 47.0                                                   |
|                                           | (15d, 8)                                                          | 45.5                                                     | 57.2                                                   |
|                                           | (15e, 8)                                                          | 27.3                                                     | 38.2                                                   |
|                                           | (15f, 8)                                                          | 37.6                                                     | 49.2                                                   |
|                                           |                                                                   |                                                          |                                                        |
|                                           |                                                                   |                                                          |                                                        |
|                                           |                                                                   |                                                          |                                                        |

| CID reaction                         | Relevant Structures in text<br>(reactants, products) <sup>a</sup> | B3LYP Reaction $\Delta H$<br>in kcal mol <sup>-1 b</sup> | MP2 Reaction $\Delta H$<br>in kcal mol <sup>-1 c</sup> |
|--------------------------------------|-------------------------------------------------------------------|----------------------------------------------------------|--------------------------------------------------------|
| $Ag_5HCN \rightarrow Ag_4CN^+ + AgH$ | (14a, 16a)                                                        | 35.6                                                     | 40.3                                                   |
|                                      | (14b, 16b)                                                        | 38.7                                                     | 41.7                                                   |
|                                      | (15c, 16a)                                                        | 23.8                                                     | 29.4                                                   |
|                                      | (15d, 16b)                                                        | 23.1                                                     | 28.8                                                   |
|                                      | (15e, 16a)                                                        | 15.0                                                     | 20.6                                                   |
|                                      | (15f, 16b)                                                        | 15.2                                                     | 20.9                                                   |
|                                      |                                                                   |                                                          |                                                        |
|                                      |                                                                   |                                                          |                                                        |

- (a) The numbers refer to those used in the text and figures.  
 (b) The reaction enthalpy is calculated using the (B3LYP + ZPE) values.  
 (c) The reaction enthalpy is calculated using the (MP2 + ZPE) values
